# Supplementary material
Source: publisher site journal article supplement (https://www.dovepress.com/get_supplementary_file.php?f=216745-S6.xlsx)
Supplement: Supplementary file 1 [file get_supplementary_file.php]

## Sheet: Mutation details
Table.S6 InDels variation details associated with drug resistance genes
Reference	isolate	Indel_class	locus_tag	gene_id:gene_variations	start	end	Ref	End	Description
HRAB-85	MDR-CQE	Frameshift Deletion	BKJ37_RS06525	gene1295:cds1246#NZ_CP018143.1#1367646:wholegene,	1367637	1367655	AGCAGCAACGATGTTACGC	-	AacA4 family aminoglycoside N(6')-acetyltransferase
	MDR-CQI	Frameshift Deletion	BKJ37_RS06525	gene1295:cds1246#NZ_CP018143.1#1367646:wholegene,	1367637	1367655	AGCAGCAACGATGTTACGC	-	AacA4 family aminoglycoside N(6')-acetyltransferase
MDR-ZJ06	MDR-CQC	Frameshift Insertion	ABZJ_RS13855	gene2796:cds2745#NC_017171.1#2878159:exon1:c.116dupG:p.C39fs,	2878274	2878274	-	G	amino acid permease
	MDR-CQE	Frameshift Deletion	ABZJ_RS06430	gene1300:cds1259#NC_017171.1#1343307:wholegene,	1343298	1343316	AGCAGCAACGATGTTACGC	-	AacA4 family aminoglycoside N(6')-acetyltransferase
	MDR-CQI	Frameshift Deletion	ABZJ_RS06430	gene1300:cds1259#NC_017171.1#1343307:wholegene,	1343298	1343316	AGCAGCAACGATGTTACGC	-	AacA4 family aminoglycoside N(6')-acetyltransferase

## Sheet: InDels_tatistics
InDels tatistics
ref	sample	Indel mutation statistics
		Count	Frameshift Deletion	Frameshift Insertion
HRAB-85	MDR-CQA	0	0	0
	MDR-CQB	0	0	0
	MDR-CQC	0	0	0
	MDR-CQD	0	0	0
	MDR-CQE	1	1	0
	MDR-CQF	0	0	0
	MDR-CQG	0	0	0
	MDR-CQH	0	0	0
	MDR-CQI	1	1	0
	MDR-CQJ	0	0	0
MDR-TJ	MDR-CQA	0	0	0
	MDR-CQB	0	0	0
	MDR-CQC	0	0	0
	MDR-CQD	0	0	0
	MDR-CQE	0	0	0
	MDR-CQF	0	0	0
	MDR-CQG	0	0	0
	MDR-CQH	0	0	0
	MDR-CQI	0	0	0
	MDR-CQJ	0	0	0
MDR-ZJ06	MDR-CQA	0	0	0
	MDR-CQB	0	0	0
	MDR-CQC	1	0	1
	MDR-CQD	0	0	0
	MDR-CQE	1	1	0
	MDR-CQF	0	0	0
	MDR-CQG	1	0	1
	MDR-CQH	0	0	0
	MDR-CQI	1	1	0
	MDR-CQJ	0	0	0
